# Supplementary material for: Multiple Kinases Can Phosphorylate the N-Terminal Sequences of Mitochondrial Proteins in Arabidopsis thaliana
Source: Front Plant Sci. 2018 Jul 10;9:982. doi: 10.3389/fpls.2018.00982 (PMC6048449; doi:10.3389/fpls.2018.00982)
Supplement: Supplementary file 1 [file Table_1.XLSX]

## Sheet: Table S1
Supplementary Table S1: A list of experimentally-proven phosphorylation sites on the first 60 amino acid residues of mitochondrial proteins.
103 proteins	Experimental proven sites	Primary Gene Symbol	Functional process	Gene Model Description
At1g14980	K32, S34, K35	Chaperonin 10 CPN10	Chaperone	Encodes mitochondrial-localized chaperonin 10 that complements the E.coli groES mutant. Its mRNA is upregulated in response to heat shock treatment and is expressed uniformly in various organs.
At5g55200	K30	Mitochondrial GrpE 1	Chaperone	Co-chaperone GrpE family protein; FUNCTIONS IN: copper ion binding, ATP binding; INVOLVED IN: protein folding, protein import into mitochondrial matrix; LOCATED IN: mitochondrion; EXPRESSED IN: 22 plant structures; EXPRESSED DURING: 13 growth stages; CONTAINS InterPro DOMAIN/s: GrpE nucleotide exchange factor (InterPro:IPR000740), GrpE nucleotide exchange factor, head (InterPro:IPR009012), GrpE n…
At4g24190	S54	Shepherd SHD	Chaperone	encodes an ortholog of GRP94, an ER-resident HSP90-like protein and is involved in regulation of meristem size and organization. Single and double mutant analyses suggest that SHD may be required for the correct folding and/or complex formation of CLV proteins. Lines carrying recessive mutations in this locus exhibits expanded shoot meristems, disorganized root meristems, and defective pollen tub…
At3g01500	T35, T40, T42, S43, K46, K47, T54, K56	Carbonic Anhydrase 1, CA1	Complex I	Encodes a putative beta-carbonic anhydrase betaCA1. Together with betaCA4 (At1g70410) regulates CO2-controlled stomatal movements in guard cells.
At5g18800	S2, S3, T8, T14, S15, T19, S21	Complex I subunit	Complex I	Cox19-like CHCH family protein; FUNCTIONS IN: NADH dehydrogenase (ubiquinone) activity; INVOLVED IN: mitochondrial electron transport, NADH to ubiquinone; LOCATED IN: mitochondrial respiratory chain complex I; EXPRESSED IN: 24 plant structures; EXPRESSED DURING: 14 growth stages; CONTAINS InterPro DOMAIN/s: CHCH (InterPro:IPR010625); BEST Arabidopsis thaliana protein match is: Cox19-like CHCH fam…
At5g64400	S21	Complex I subunit	Complex I	BEST Arabidopsis thaliana protein match is: Cox19-like CHCH family protein (TAIR:AT5G09570.1); Has 127 Blast hits to 125 proteins in 40 species: Archae - 0; Bacteria - 9; Metazoa - 16; Fungi - 2; Plants - 64; Viruses - 0; Other Eukaryotes - 36 (source: NCBI BLink).
At5g37510	T22, S23	Gamma Carbonic Anhydrase-Like 2 Gamma, CAL2	Complex I	Encodes a subunit of the 400 kDa subcomplex of the mitochondrial NADH dehydrogenase (complex I). The protein has been isolated in the male gametophyte.
At3g48680	K3, S48,	Succinate Dehydrogenase 1-2, SDH1-2	Complex I	Encodes a mitochondrial gamma carbonic anhydrase-like protein. Component of the NADH dehydrogenase complex.
At3g47833	T20	Succinate Dehydrogenase 7, SDH7	Complex II	predicted to encode subunit 7 of mitochondrial complex II and to participate in the respiratory chain
At2g18450	T22, S23, S26	Succinate Dehydrogenase 7, SDH7	Complex II	Nuclear encoded mitochondrial flavoprotein subunit of succinate dehydrogenase complex .
At3g15352	T2	COX17	Complex IV	Encodes protein similar to yeast COX17, a copper-binding protein that mediates the delivery of Cu to the mitochondria for the assembly of a functional cytochrome oxidase complex.
At4g37830	T15, K20	Cytochrome c oxidase-related	Complex IV	cytochrome c oxidase-related; FUNCTIONS IN: cytochrome-c oxidase activity; LOCATED IN: mitochondrion; EXPRESSED IN: 24 plant structures; EXPRESSED DURING: 15 growth stages; CONTAINS InterPro DOMAIN/s: Cytochrome c oxidase, subunit VIa (InterPro:IPR001349); Has 184 Blast hits to 184 proteins in 52 species: Archae - 0; Bacteria - 0; Metazoa - 127; Fungi - 0; Plants - 48; Viruses - 0; Other Eukaryot…
At3g15640	S21, S56	Rubredoxin-like superfamily protein	Complex IV	Rubredoxin-like superfamily protein; FUNCTIONS IN: cytochrome-c oxidase activity, cobalt ion binding, zinc ion binding, metal ion binding; LOCATED IN: mitochondrial envelope, mitochondrion, chloroplast thylakoid membrane; EXPRESSED IN: 22 plant structures; EXPRESSED DURING: 13 growth stages; CONTAINS InterPro DOMAIN/s: Cytochrome c oxidase, subunit Vb (InterPro:IPR002124); BEST Arabidopsis thalia…
At5g08680	S3, S16	Atp Synthase Beta-Subunit	Complex V	Encodes the mitochondrial ATP synthase beta-subunit. This subunit is encoded by a multigene family of three members (At5g08670, At5g08680, At5g08690) that shared 98% sequence identity at the amino acid level.
At5g08690	S31	Atp Synthase Beta-Subunit	Complex V	Encodes the mitochondrial ATP synthase beta-subunit. This subunit is encoded by a multigene family of three members (At5g08670, At5g08680, At5g08690) that shared 98% sequence identity at the amino acid level.
At5g08670	S54, S58	Atp Synthase Beta-Subunit	Complex V	Encodes the mitochondrial ATP synthase beta-subunit. This subunit is encoded by a multigene family of three members (At5g08670, At5g08680, At5g08690) that shared 98% sequence identity at the amino acid level.
At2g07707	S57, K58	Atp Synthase subunit 8	Complex V	Plant mitochondrial ATPase, F0 complex, subunit 8 protein; FUNCTIONS IN: cobalt ion binding; INVOLVED IN: ATP synthesis coupled proton transport; LOCATED IN: mitochondrion, vacuole, membrane; EXPRESSED IN: cultured cell, leaf; CONTAINS InterPro DOMAIN/s: ATPase, F0 complex, subunit 8, mitochondrial, plant (InterPro:IPR003319), Protein of unknown function DUF1082, plant mitochondria (InterPro:IPR0…
At3g10690	S28	Dna Gyrase A GYRA	DNA topoisomerase	DNA GYRASE A (GYRA); FUNCTIONS IN: DNA topoisomerase activity, catalytic activity, ATP binding; INVOLVED IN: DNA topological change, DNA metabolic process; LOCATED IN: mitochondrion, chloroplast, nucleoid; EXPRESSED IN: 22 plant structures; EXPRESSED DURING: 13 growth stages; CONTAINS InterPro DOMAIN/s: DNA gyrase, subunit A (InterPro:IPR005743), DNA topoisomerase, type IIA, subunit A/C-terminal …
At5g55660	S19, K22, S24, S28	Dek Domain-Containing Chromatin Associated Protein	DNA binding	DEK domain-containing chromatin associated protein; CONTAINS InterPro DOMAIN/s: DEK, C-terminal (InterPro:IPR014876); BEST Arabidopsis thaliana protein match is: DEK domain-containing chromatin associated protein (TAIR:AT4G26630.2); Has 1807 Blast hits to 1807 proteins in 277 species: Archae - 0; Bacteria - 0; Metazoa - 736; Fungi - 347; Plants - 385; Viruses - 0; Other Eukaryotes - 339 (source: …
At2g19490	S50, K57	RECA2	DNA recombination	recA DNA recombination family protein; FUNCTIONS IN: in 6 functions; INVOLVED IN: DNA repair, SOS response, DNA recombination, DNA metabolic process; CONTAINS InterPro DOMAIN/s: DNA recombination/repair protein RecA/RadB, ATP-binding domain (InterPro:IPR020588), ATPase, AAA+ type, core (InterPro:IPR003593), DNA recombination/repair protein RecA, conserved site (InterPro:IPR020584), DNA recombinat…
At3g20970	S10, S12	Nfu Domain Protein 4 Nfu4	Fe/S Cluster Biogenesis	Encodes a protein containing the NFU domain that may be involved in iron-sulfur cluster assembly. Part of a five member gene family, more closely related to NFU5 than to NFU1,2, and 3. Targeted to the mitochondrion.
At5g61220	S5, S9, T34	Lyr Family Of Fe/S Cluster Biogenesis Protein	Fe/S Cluster Biogenesis	LYR family of Fe/S cluster biogenesis protein; CONTAINS InterPro DOMAIN/s: Complex 1 LYR protein (InterPro:IPR008011); Has 1807 Blast hits to 1807 proteins in 277 species: Archae - 0; Bacteria - 0; Metazoa - 736; Fungi - 347; Plants - 385; Viruses - 0; Other Eukaryotes - 339 (source: NCBI BLink).
At2g26080	S47	Glycine Decarboxylase P-Protein 2, GLDP2	Glycine metabolism	glycine decarboxylase P-protein 2 (GLDP2); FUNCTIONS IN: glycine dehydrogenase (decarboxylating) activity, ATP binding; INVOLVED IN: oxidation reduction, glycine decarboxylation via glycine cleavage system, glycine metabolic process; LOCATED IN: mitochondrion, glycine cleavage complex, chloroplast, chloroplast envelope; EXPRESSED IN: 33 plant structures; EXPRESSED DURING: 16 growth stages; CONTAI…
At3g11670	T5, S10, S11, T12, S13, T15, T16, T18, S19, S20, S21, S22, S23, S25, T27, S29, S30, T31, S35, S38	Digalactosyl Diacylglycerol Deficient 1, DGD1	Lipid biosynthesis	Responsible for the final assembly of galactolipids in photosynthetic membranes. Provides stability to the PS I core complex (e.g. subunits PsaD, PsaE).
At4g20930	T8, K14	6-Phosphogluconate Dehydrogenase Family Protein	Metabolism	6-phosphogluconate dehydrogenase family protein; FUNCTIONS IN: in 7 functions; INVOLVED IN: oxidation reduction, pentose-phosphate shunt, valine metabolic process, valine catabolic process, metabolic process; EXPRESSED IN: 22 plant structures; EXPRESSED DURING: 13 growth stages; CONTAINS InterPro DOMAIN/s: 6-phosphogluconate dehydrogenase, NAD-binding (InterPro:IPR006115), 6-phosphogluconate dehy…
At5g14780	S15, S16, S17, S18, S19, S20, Y22	Formate Dehydrogenase FDH	Metabolism	Encodes a NAD-dependent formate dehydrogenase.
At3g14420	T4	Glycolate Oxidase 1, GOX1	Metabolism	Encodes a glycolate oxidase that modulates reactive oxygen species-mediated signal transduction during nonhost resistance.
At1g53580	S29	Glyoxalase 3, GLY3	Metabolism	Mononuclear Fe(II)-containing member of the b-lactamase fold superfamily. ETHE1 is homodimeric in solution, exhibits low-level esterase activity, and specifically binds a single Fe(II) atom in the active site.
At4g10750	S31, S33, S35, S38, S39	Phosphoenolpyruvate Carboxylase Family Protein	Metabolism	Phosphoenolpyruvate carboxylase family protein; FUNCTIONS IN: carbon-carbon lyase activity, catalytic activity; INVOLVED IN: in 7 processes; LOCATED IN: mitochondrion, chloroplast; EXPRESSED IN: 24 plant structures; EXPRESSED DURING: 13 growth stages; CONTAINS InterPro DOMAIN/s: Pyruvate/Phosphoenolpyruvate kinase, catalytic core (InterPro:IPR015813), HpcH/HpaI aldolase (InterPro:IPR005000); BEST…
At3g45770	S55	Polyketide Synthase	Metabolism	Polyketide synthase, enoylreductase family protein; FUNCTIONS IN: copper ion binding, zinc ion binding, ATP binding; INVOLVED IN: oxidation reduction, metabolic process; LOCATED IN: mitochondrion, chloroplast, nucleus; EXPRESSED IN: 25 plant structures; EXPRESSED DURING: 13 growth stages; CONTAINS InterPro DOMAIN/s: GroES-like (InterPro:IPR011032), Polyketide synthase, enoylreductase (InterPro:IP…
At5g13420	S30	Transaldolase 2 TRA2	Metabolism	Aldolase-type TIM barrel family protein; FUNCTIONS IN: catalytic activity, transaldolase activity; INVOLVED IN: response to cadmium ion; LOCATED IN: mitochondrion, chloroplast stroma, chloroplast; EXPRESSED IN: 25 plant structures; EXPRESSED DURING: 15 growth stages; CONTAINS InterPro DOMAIN/s: Transaldolase subfamily (InterPro:IPR004732), Aldolase-type TIM barrel (InterPro:IPR013785), Transaldol…
At1g73980	S6, S10	Triphosphate Tunnel Metalloenzyme 1 Ttm1	Metabolism	Phosphoribulokinase / Uridine kinase family; FUNCTIONS IN: adenylate cyclase activity, phosphotransferase activity, alcohol group as acceptor, kinase activity, ATP binding; INVOLVED IN: biosynthetic process, cAMP biosynthetic process, metabolic process; EXPRESSED IN: 23 plant structures; EXPRESSED DURING: 13 growth stages; CONTAINS InterPro DOMAIN/s: Phosphoribulokinase/uridine kinase (InterPro:I…
At5g63400	T3	Adenylate Kinase 1 ADK1	Metabolism	encodes a protein similar to adenylate kinase.
At5g42650	S34, S36, S49, K50	Allene Oxide Synthase AOS	Metabolism	Encodes a member of the cytochrome p450 CYP74 gene family that functions as an allene oxide synthase. This enzyme catalyzes dehydration of the hydroperoxide to an unstable allene oxide in the JA biosynthetic pathway. It shows a dual catalytic activity, the major one being a 13-AOS but also expressing a 9-AOS activity.
At1g07180	S11, S16, S17	Alternative NADPH Dehydrogenase 1 NDA1	NADPH Dehydrogenase	Internal NAD(P)H dehydrogenase in mitochondria. The predicted protein sequence has high homology with other designated NAD(P)H DHs from microorganisms; the capacity for matrix NAD(P)H oxidation via the rotenone-insensitive pathway is significantly reduced in the Atndi1 mutant plant line; the in vitro translation product of AtNDI1 is imported into isolated mitochondria and located on the inside of…
At2g29990	S24, S26, S35, C38	Alternative NAD(P)H dehydrogenase 2 (NDA2)	NADPH Dehydrogenase	alternative NAD(P)H dehydrogenase 2 (NDA2); FUNCTIONS IN: NADH dehydrogenase activity, oxidoreductase activity, FAD binding; INVOLVED IN: oxidation reduction; LOCATED IN: intrinsic to mitochondrial inner membrane; EXPRESSED IN: 24 plant structures; EXPRESSED DURING: 13 growth stages; CONTAINS InterPro DOMAIN/s: FAD-dependent pyridine nucleotide-disulphide oxidoreductase (InterPro:IPR013027), Pyri…
At5g18170	T7	Glutamate Dehydrogenase 1 GDH1	Nitrogen metabolism	Encodes the 43 kDa alpha-subunit of the glutamate dehydrogenase with a putative mitochondrial transit polypeptide and NAD(H)- and alpha-ketoglutarate-binding domains. mitochondrial localization confirmed by subcellular fractionation. Combines in several ratios with GDH2 protein (GDH-beta) to form seven isoenzymes. Catalyzes the cleavage of glycine residues. May be involved in ammonia assimilation…
At5g59880	S59	Actin Depolymerizing Factor 3 ADF3	Others	Encodes actin depolymerizing factor 3 (ADF3).
At5g49555	S5, S7, T8	FAD/NAD(P)-Binding Oxidoreductase Family Protein	Oxidoreductase	FAD/NAD(P)-binding oxidoreductase family protein; CONTAINS InterPro DOMAIN/s: FAD dependent oxidoreductase (InterPro:IPR006076); BEST Arabidopsis thaliana protein match is: carotenoid isomerase (TAIR:AT1G06820.1); Has 30201 Blast hits to 17322 proteins in 780 species: Archae - 12; Bacteria - 1396; Metazoa - 17338; Fungi - 3422; Plants - 5037; Viruses - 0; Other Eukaryotes - 2996 (source: NCBI BLi…
At2g33220	S40, T42, S45, M47	Grim-19 Protein	Photorespiration	GRIM-19 protein; FUNCTIONS IN: molecular_function unknown; INVOLVED IN: photorespiration; LOCATED IN: mitochondrion, mitochondrial membrane, mitochondrial respiratory chain complex I, respiratory chain complex I; EXPRESSED IN: 25 plant structures; EXPRESSED DURING: 15 growth stages; CONTAINS InterPro DOMAIN/s: GRIM-19 (InterPro:IPR009346); BEST Arabidopsis thaliana protein match is: GRIM-19 prote…
At4g37930	S12, S13, K16, S26, T46	Serine Transhydroxymethyltransferase 1 Shm1	Photorespiration	Encodes a protein with mitochondrial serine hydroxymethyltransferase activity, which functions in the photorespiratory pathway, catalyzes the conversion of serine and tetrahydrofolate to glycine and 5,10-methylene tetrahydrofolate. Involved in controlling cell damage caused by abiotic stress, such as high light and salt and the hypersensitive defense response of plants.
At5g26860	S36, S47	Lon Protease 1 LON1	Protease	Encodes a member of the Lon protease-like proteins (Lon1/At5g26860, Lon2/At5g47040, Lon3/At3g05780, Lon4/At3g05790). Lon is a multifunctional ATP-dependent protease which exists in bacteria, archaea and within organelles in eukaryotic cells. Lon proteases are responsible for the degradation of abnormal, damaged and unstable proteins.
At1g06200	S3	Peptidase S24/S26a/S26b/S26c Family Protein	Protease	Peptidase S24/S26A/S26B/S26C family protein; CONTAINS InterPro DOMAIN/s: Peptidase S24/S26A/S26B/S26C, beta-ribbon domain (InterPro:IPR011056), Peptidase S24/S26A/S26B/S26C (InterPro:IPR015927); BEST Arabidopsis thaliana protein match is: Peptidase S24/S26A/S26B/S26C family protein (TAIR:AT2G31140.1); Has 259 Blast hits to 259 proteins in 81 species: Archae - 0; Bacteria - 8; Metazoa - 68; Fungi …
At4g17740	S10	Peptidase S41 Family Protein	Protease	Peptidase S41 family protein; FUNCTIONS IN: serine-type peptidase activity; INVOLVED IN: proteolysis, intracellular signaling pathway; LOCATED IN: thylakoid, thylakoid lumen, mitochondrion, chloroplast thylakoid lumen; EXPRESSED IN: 22 plant structures; EXPRESSED DURING: 15 growth stages; CONTAINS InterPro DOMAIN/s: Peptidase S41 (InterPro:IPR005151), PDZ/DHR/GLGF (InterPro:IPR001478), Peptidase …
At4g07670	T3	Protease-Associated (Pa) Domain-Containing Protein	Protease	protease-associated (PA) domain-containing protein; CONTAINS InterPro DOMAIN/s: Protease-associated PA (InterPro:IPR003137); BEST Arabidopsis thaliana protein match is: Peptidase M28 family protein (TAIR:AT5G19740.1); Has 1547 Blast hits to 1542 proteins in 265 species: Archae - 2; Bacteria - 277; Metazoa - 551; Fungi - 328; Plants - 113; Viruses - 0; Other Eukaryotes - 276 (source: NCBI BLink).
At4g37040	T52	Methionine Aminopeptidase 1D, MAP1D	Protease	encodes a methionine aminopeptidase
At2g44950	S15, S16, K27	Histone Mono-Ubiquitination 1 HUB1	Protein degradation	The gene encodes one of two orthologous E3 ubiquitin ligases in Arabidopsis that are involved in monoubiquitination of histone H2B.
At1g70320	S9, K14	Ubiquitin-Protein Ligase 2 UPL2	Protein degradation	encodes a ubiquitin-protein ligase-like protein containing a HECT domain. There are six other HECT-domain UPLs in Arabidopsis.
At1g18480	S2, S3, S8	Shewenella-Like Protein Phosphatase 2 SLP2	Protein phosphatase	Calcineurin-like metallo-phosphoesterase superfamily protein; FUNCTIONS IN: hydrolase activity, protein serine/threonine phosphatase activity; INVOLVED IN: biological_process unknown; LOCATED IN: cellular_component unknown; EXPRESSED IN: 24 plant structures; EXPRESSED DURING: 15 growth stages; CONTAINS InterPro DOMAIN/s: Metallophosphoesterase (InterPro:IPR004843); BEST Arabidopsis thaliana prote…
At4g11600	S60	Glutathione Peroxidase 6 GPX6	Redox homeostasis	Encodes glutathione peroxidase.
At1g78380	K40, S41, K52	Glutathione S-Transferase Tau 19 GSTU19	Redox homeostasis	Encodes a glutathione transferase that is a member of Tau GST gene family. Expression is induced by drought stress, oxidative stress, and high doses of auxin and cytokinin. naming convention according to Wagner et al. (2002) The expression of this gene is upregulated by herbicide safeners such as benoxacor and fenclorim.
At3g06050	S53	Peroxiredoxin Iif Prxiif	Redox homeostasis	Encodes a mitochondrial matrix localized peroxiredoxin involved in redox homeostasis. Knockout mutants have reduced root growth under certain oxidative stress conditions.
At3g27890	S19, K22, S24	NAD(P)H:quinone reductase	Reductase	Encodes NAD(P)H:quinone reductase which is an FMN binding protein that catalyzes the reduction of quinone substrates to hydroquinones.The enzyme activity was confirmed by in vitro assay.
At2g30470	S8, T18	High-Level Expression Of Sugar-Inducible Gene 2 Hsi2	Repressor	HSI2 is a member of a novel family of B3 domain proteins with a sequence similar to the ERF-associated amphiphilic repression (EAR) motif. It functions as an active repressor of the Spo minimal promoter (derived from a gene for sweet potato sporamin A1) through the EAR motif. It contains a plant-specific B3 DNA-binding domain. The Arabidopsis genome contains 42 genes with B3 domains which could b…
At1g61870	S5	Pentatricopeptide Repeat 336	RNA editing	pentatricopeptide repeat 336 (PPR336); LOCATED IN: mitochondrion, membrane; EXPRESSED IN: 22 plant structures; EXPRESSED DURING: 13 growth stages; CONTAINS InterPro DOMAIN/s: Pentatricopeptide repeat (InterPro:IPR002885); BEST Arabidopsis thaliana protein match is: Tetratricopeptide repeat (TPR)-like superfamily protein (TAIR:AT1G11630.1); Has 31000 Blast hits to 9550 proteins in 270 species: Arc…
At3g06790	T17, S20, S35	MORF3	RNA editing	Encodes a protein involved in RNA editing in mitochondria.
At5g61030	T14, T15	Rna-Binding Glycine-Rich Protein A7 RBGA7	RNA editing	Encodes a glycine-rich RNA binding protein that is involved in C-> U RNA editing in mitochondria. Gene expression is induced by cold.
At4g00570	S10, T18, S21	NAD-Dependent Malic Enzyme 2 NAD-ME2	TCA	Encodes an NAD-dependent malic enzyme (NAD-ME) that does not act on oxaloacetate, indicating that it belongs to EC 1.1.1.39. It is a member of the beta family of NAD-MEs in plants. It appears to function as a homodimer or as a heterodimer with the alpha-type NAD-ME2 (At2g13560). NAD-ME2 transcript and protein levels are higher during the night than during the day.
At1g53240	S21, S23, S26	Mitochondrial Malate Dehydrogenase 1 mMDH1	TCA	mMDH1 encodes a mitochrondrial malate dehydrogenase. It is expressed at higher levels than the other mitochrondrial isoform mMDH2 (At3G15020) according to transcript and proteomic analyses.
At5g50850	T15	Macci-Bou MAB1	TCA	MACCI-BOU (MAB1); FUNCTIONS IN: pyruvate dehydrogenase (acetyl-transferring) activity, catalytic activity; INVOLVED IN: defense response to bacterium; LOCATED IN: mitochondrion, nucleolus, plasma membrane; EXPRESSED IN: 25 plant structures; EXPRESSED DURING: 17 growth stages; CONTAINS InterPro DOMAIN/s: Transketolase, C-terminal (InterPro:IPR005476), Transketolase-like, C-terminal (InterPro:IPR01…
At4g26970	K47, S48	Acontinase 2, ACO2	TCA	Encodes an aconitase that can catalyze the conversion of citrate to isocitrate through a cis-aconitate intermediate, indicating that it may participate in the TCA cycle and other primary metabolic pathways. The protein is believed to accumulate in the mitochondria and the cytosol. It affects CSD2 (At2g28190 - a superoxide dismutase) transcript levels and may play a role in the response to oxidati…
At1g55890	S5	Tetratricopeptide Repeat (Tpr)-Like Superfamily Protein	TPR	Tetratricopeptide repeat (TPR)-like superfamily protein; CONTAINS InterPro DOMAIN/s: Pentatricopeptide repeat (InterPro:IPR002885); BEST Arabidopsis thaliana protein match is: Tetratricopeptide repeat (TPR)-like superfamily protein (TAIR:AT3G13160.1); Has 41765 Blast hits to 13385 proteins in 277 species: Archae - 5; Bacteria - 48; Metazoa - 331; Fungi - 377; Plants - 39933; Viruses - 0; Other Eu…
At4g36680	T24, S27, S28, S57	Tetratricopeptide Repeat (Tpr)-Like Superfamily Protein	TPR	Tetratricopeptide repeat (TPR)-like superfamily protein; CONTAINS InterPro DOMAIN/s: Pentatricopeptide repeat (InterPro:IPR002885); BEST Arabidopsis thaliana protein match is: Tetratricopeptide repeat (TPR)-like superfamily protein (TAIR:AT2G18520.1); Has 31603 Blast hits to 11701 proteins in 258 species: Archae - 3; Bacteria - 12; Metazoa - 242; Fungi - 164; Plants - 30323; Viruses - 0; Other Eu…
At1g11630	S26	Tetratricopeptide Repeat (Tpr)-Like Superfamily Protein	TPR	Tetratricopeptide repeat (TPR)-like superfamily protein; CONTAINS InterPro DOMAIN/s: Pentatricopeptide repeat (InterPro:IPR002885); BEST Arabidopsis thaliana protein match is: pentatricopeptide repeat 336 (TAIR:AT1G61870.1); Has 27426 Blast hits to 8035 proteins in 245 species: Archae - 4; Bacteria - 14; Metazoa - 220; Fungi - 290; Plants - 26279; Viruses - 0; Other Eukaryotes - 619 (source: NCBI…
At1g15810	S17	S15/NS1, RNA-binding protein	Translation	S15/NS1, RNA-binding protein; FUNCTIONS IN: structural constituent of ribosome; INVOLVED IN: translation; LOCATED IN: small ribosomal subunit, ribosome, intracellular; EXPRESSED IN: 24 plant structures; EXPRESSED DURING: 14 growth stages; CONTAINS InterPro DOMAIN/s: Ribosomal protein S15 (InterPro:IPR000589), Ribosomal protein S15, bacterial-type (InterPro:IPR005290), S15/NS1, RNA-binding (InterP…
At1g07920	T22, Y29, K30	GTP binding Elongation factor Tu family protein	Translation	GTP binding Elongation factor Tu family protein; FUNCTIONS IN: calmodulin binding, translation elongation factor activity; INVOLVED IN: response to cadmium ion; LOCATED IN: mitochondrion, nucleolus, plasma membrane, chloroplast, membrane; EXPRESSED IN: 6 plant structures; EXPRESSED DURING: seedling growth; CONTAINS InterPro DOMAIN/s: Translation elongation factor EFTu/EF1A, C-terminal (InterPro:I…
At2g45030	T6, S7	Translation elongation factor EFG/EF2 protein	Translation	Translation elongation factor EFG/EF2 protein; FUNCTIONS IN: translation factor activity, nucleic acid binding, GTP binding, translation elongation factor activity, GTPase activity; INVOLVED IN: response to cadmium ion; LOCATED IN: mitochondrion; EXPRESSED IN: cultured cell; CONTAINS InterPro DOMAIN/s: Protein synthesis factor, GTP-binding (InterPro:IPR000795), Translation elongation factor EFG/E…
At2g31170	T47, S50, S51, T53	Cysteinyl t-RNA synthetase	Translation	Encodes the cysteinyl t-RNA synthetase SYCO ARATH (SYCO), which is expressed and required in the central cell but not in the antipodals. SYCO, localized to the mitochondria, is necessary for mitochondrial cristae integrity. Mutation of this gene affects the lifespan of adjacent accessory cells.
At5g60390	Y29	GTP Binding Elongation Factor Tu Family Protein	Translation	GTP binding Elongation factor Tu family protein; FUNCTIONS IN: calmodulin binding, translation elongation factor activity; INVOLVED IN: translational elongation; LOCATED IN: mitochondrion, nucleus, plasma membrane, vacuole, cytoplasm; EXPRESSED IN: 6 plant structures; EXPRESSED DURING: L mature pollen stage, M germinated pollen stage, seed development stages; CONTAINS InterPro DOMAIN/s: Translati…
At4g11120	S23, S24, Y28	translation elongation factor Ts (EF-Ts)	Translation	translation elongation factor Ts (EF-Ts), putative; FUNCTIONS IN: translation elongation factor activity; INVOLVED IN: translational elongation; LOCATED IN: mitochondrion; EXPRESSED IN: 22 plant structures; EXPRESSED DURING: 13 growth stages; CONTAINS InterPro DOMAIN/s: Translation elongation factor Ts, conserved site (InterPro:IPR018101), Translation elongation factor EFTs/EF1B (InterPro:IPR0018…
At5g66860	S10, T12, S21, S22	Ribosomal protein L25/Gln-tRNA synthetase	Translation	Ribosomal protein L25/Gln-tRNA synthetase, anti-codon-binding domain; INVOLVED IN: translation; LOCATED IN: mitochondrion; CONTAINS InterPro DOMAIN/s: Ribosomal protein L25, beta domain (InterPro:IPR020057), Ribosomal protein L25/Gln-tRNA synthetase, anti-codon-binding domain (InterPro:IPR011035); BEST Arabidopsis thaliana protein match is: Ribosomal protein L25/Gln-tRNA synthetase, anti-codon-bi…
At1g07930	Y29	GTP binding Elongation factor Tu family protein	Translation	GTP binding Elongation factor Tu family protein; FUNCTIONS IN: calmodulin binding, translation elongation factor activity; INVOLVED IN: translational elongation; LOCATED IN: mitochondrion, vacuole; EXPRESSED IN: cotyledon, male gametophyte, guard cell, juvenile leaf, leaf; EXPRESSED DURING: seedling growth; CONTAINS InterPro DOMAIN/s: Translation elongation factor EFTu/EF1A, C-terminal (InterPro:…
At1g50200	S52	Alanyl-tRNA synthetase (ALATS)	Translation	Alanyl-tRNA synthetase (ALATS); FUNCTIONS IN: alanine-tRNA ligase activity, ligase activity, forming aminoacyl-tRNA and related compounds, nucleotide binding, nucleic acid binding, ATP binding; INVOLVED IN: alanyl-tRNA aminoacylation, response to cadmium ion; LOCATED IN: mitochondrion, chloroplast; EXPRESSED IN: 25 plant structures; EXPRESSED DURING: 13 growth stages; CONTAINS InterPro DOMAIN/s: …
At1g32050	S21, S39	SCAMP family protein	Transport	SCAMP family protein; FUNCTIONS IN: transmembrane transporter activity; INVOLVED IN: protein transport; LOCATED IN: mitochondrion, plasma membrane; EXPRESSED IN: 23 plant structures; EXPRESSED DURING: 14 growth stages; CONTAINS InterPro DOMAIN/s: SCAMP (InterPro:IPR007273); BEST Arabidopsis thaliana protein match is: secretory carrier 3 (TAIR:AT1G61250.1); Has 679 Blast hits to 677 proteins in 10…
At4g00026	S27, T29	Segregation Distortion 3 SD3	Transport	Encodes SD3 (Segregation Distortion 3), a protein with high similarity to yeast translocase on the inner mitochondrial membrane 21 (TIM21). sd3 mutants show seedling-lethal phenotype in light-grown seedlings and shorter hypocotyls in dark-grown seedlings. SD3 overexpression plants show increase in cell number and cell size, as well as elevated ATP level.
At4g15010	S42	Mitochondrial Substrate Carrier Family Protein	Transport	mitochondrial substrate carrier family protein; FUNCTIONS IN: binding; INVOLVED IN: transport, mitochondrial transport, transmembrane transport; LOCATED IN: endomembrane system, mitochondrial inner membrane, membrane; EXPRESSED IN: 19 plant structures; EXPRESSED DURING: 8 growth stages; CONTAINS InterPro DOMAIN/s: mitochondrial substrate carrier (InterPro:IPR001993), mitochondrial substrate/solut…
At5g41685	T4, S6, K8	Tom7	Transport	mitochondrial outer membrane translocase complex, subunit Tom7; FUNCTIONS IN: protein transporter activity, P-P-bond-hydrolysis-driven protein transmembrane transporter activity; INVOLVED IN: intracellular protein transport; LOCATED IN: mitochondrial outer membrane; EXPRESSED IN: 23 plant structures; EXPRESSED DURING: 13 growth stages; CONTAINS InterPro DOMAIN/s: mitochondrial outer membrane tran…
At5g14040	T50, S51, S54	Phosphate Transporter 3;1 Pht3;1	Transport	Encodes a mitochondrial phosphate transporter. Modulates plant responses to salt stress.
At4g01660	S7, T9	Abc Transporter 1 ABC1	Transport	Encodes an ABC1-like protein, member of the ATH subfamily; putative ABC transporter; isolated by functional complementation of a yeast abc1 mutant
At4g01100	S32, Y33	Adenine Nucleotide Transporter 1 ADNT1	Transport	adenine nucleotide transporter 1 (ADNT1); CONTAINS InterPro DOMAIN/s: mitochondrial carrier protein (InterPro:IPR002067), mitochondrial substrate carrier (InterPro:IPR001993), mitochondrial substrate/solute carrier (InterPro:IPR018108); BEST Arabidopsis thaliana protein match is: mitochondrial substrate carrier family protein (TAIR:AT5G51050.1).
At5g48970	T4, T5	Mitochondrial thiamin diphosphate carrier.	Transport	Mitochondrial thiamin diphosphate carrier.
At5g41970	Y37, S38, T39, T41, S42, S44, S46, S49, K51	Metal-Dependent Protein Hydrolase	Unknown	Metal-dependent protein hydrolase; FUNCTIONS IN: molecular_function unknown; INVOLVED IN: biological_process unknown; LOCATED IN: mitochondrion; EXPRESSED IN: 24 plant structures; EXPRESSED DURING: 13 growth stages; CONTAINS InterPro DOMAIN/s: Metal-dependent protein hydrolase (InterPro:IPR003226); BEST Arabidopsis thaliana protein match is: Metal-dependent protein hydrolase (TAIR:AT3G49320.1); H…
At5g05990	S41	Mitochondrial Glycoprotein Family Protein	Unknown	mitochondrial glycoprotein family protein; FUNCTIONS IN: molecular_function unknown; INVOLVED IN: biological_process unknown; LOCATED IN: mitochondrion, mitochondrial matrix; EXPRESSED IN: 23 plant structures; EXPRESSED DURING: 15 growth stages; CONTAINS InterPro DOMAIN/s: mitochondrial glycoprotein (InterPro:IPR003428); BEST Arabidopsis thaliana protein match is: mitochondrial glycoprotein famil…
At1g49670	T46, T47, S48	NQR	Unknown	molecular function has not been defined. Was shown involved in oxidative stress tolerance.
At1g04280	T9	P-Loop Containing Nucleoside Triphosphate Hydrolases Superfamily Protein	Unknown	P-loop containing nucleoside triphosphate hydrolases superfamily protein; FUNCTIONS IN: ATP binding; INVOLVED IN: cell killing; LOCATED IN: membrane; EXPRESSED IN: leaf; CONTAINS InterPro DOMAIN/s: Zeta toxin (InterPro:IPR010488); BEST Arabidopsis thaliana protein match is: P-loop containing nucleoside triphosphate hydrolases superfamily protein (TAIR:AT1G06750.2); Has 195 Blast hits to 194 prote…
At4g16580	Y26	Protein Phosphatase 2c Family Protein	Unknown	Protein phosphatase 2C family protein; FUNCTIONS IN: phosphoprotein phosphatase activity, catalytic activity; CONTAINS InterPro DOMAIN/s: Protein phosphatase 2C-related (InterPro:IPR001932), Sporulation stage II, protein E C-terminal (InterPro:IPR010822); BEST Arabidopsis thaliana protein match is: Protein phosphatase 2C family protein (TAIR:AT5G66720.1); Has 838 Blast hits to 828 proteins in 210…
At3g10260	S29, S39	Reticulon Family Protein	Unknown	Reticulon family protein; CONTAINS InterPro DOMAIN/s: Reticulon (InterPro:IPR003388); BEST Arabidopsis thaliana protein match is: Reticulon family protein (TAIR:AT3G61560.1); Has 1060 Blast hits to 1060 proteins in 78 species: Archae - 0; Bacteria - 0; Metazoa - 591; Fungi - 0; Plants - 458; Viruses - 0; Other Eukaryotes - 11 (source: NCBI BLink).
At1g32470	S23, S30, S32	Single Hybrid Motif Superfamily Protein	Unknown	Single hybrid motif superfamily protein; FUNCTIONS IN: glycine dehydrogenase (decarboxylating) activity; INVOLVED IN: glycine catabolic process, glycine decarboxylation via glycine cleavage system; LOCATED IN: mitochondrion, glycine cleavage complex, chloroplast; EXPRESSED IN: 23 plant structures; EXPRESSED DURING: 13 growth stages; CONTAINS InterPro DOMAIN/s: 2-oxo acid dehydrogenase, lipoyl-bin…
At2g35120	S25, S26	Single Hybrid Motif Superfamily Protein	Unknown	Single hybrid motif superfamily protein; FUNCTIONS IN: glycine dehydrogenase (decarboxylating) activity, ATP binding; INVOLVED IN: glycine catabolic process, glycine decarboxylation via glycine cleavage system; LOCATED IN: mitochondrion, glycine cleavage complex; EXPRESSED IN: 22 plant structures; EXPRESSED DURING: 13 growth stages; CONTAINS InterPro DOMAIN/s: 2-oxo acid dehydrogenase, lipoyl-bin…
At5g47570	S10	Unknown Protein	Unknown	unknown protein; Has 30201 Blast hits to 17322 proteins in 780 species: Archae - 12; Bacteria - 1396; Metazoa - 17338; Fungi - 3422; Plants - 5037; Viruses - 0; Other Eukaryotes - 2996 (source: NCBI BLink).
At1g26750	S2	Unknown Protein	Unknown	unknown protein; Has 44 Blast hits to 44 proteins in 16 species: Archae - 0; Bacteria - 0; Metazoa - 0; Fungi - 0; Plants - 44; Viruses - 0; Other Eukaryotes - 0 (source: NCBI BLink).
At5g51960	S2	Unknown Protein	Unknown	CONTAINS InterPro DOMAIN/s: Complex 1 LYR protein (InterPro:IPR008011); Has 45 Blast hits to 45 proteins in 14 species: Archae - 0; Bacteria - 0; Metazoa - 0; Fungi - 0; Plants - 45; Viruses - 0; Other Eukaryotes - 0 (source: NCBI BLink).
At3g21400	S29, S58	Unknown Protein	Unknown	unknown protein; FUNCTIONS IN: molecular_function unknown; INVOLVED IN: N-terminal protein myristoylation; EXPRESSED IN: 22 plant structures; EXPRESSED DURING: 13 growth stages; Has 29 Blast hits to 29 proteins in 12 species: Archae - 0; Bacteria - 0; Metazoa - 2; Fungi - 0; Plants - 27; Viruses - 0; Other Eukaryotes - 0 (source: NCBI BLink).
At2g44525	S32	Unknown Protein	Unknown	Protein of unknown function (DUF498/DUF598); CONTAINS InterPro DOMAIN/s: Protein of unknown function DUF498 (InterPro:IPR007523); BEST Arabidopsis thaliana protein match is: Protein of unknown function (DUF498/DUF598) (TAIR:AT3G60150.1); Has 933 Blast hits to 933 proteins in 412 species: Archae - 2; Bacteria - 549; Metazoa - 118; Fungi - 87; Plants - 61; Viruses - 0; Other Eukaryotes - 116 (sourc…
At3g04950	S44, T46	Unknown Protein	Unknown	CONTAINS InterPro DOMAIN/s: SEC-C motif (InterPro:IPR004027); Has 583 Blast hits to 583 proteins in 248 species: Archae - 0; Bacteria - 488; Metazoa - 0; Fungi - 0; Plants - 34; Viruses - 0; Other Eukaryotes - 61 (source: NCBI BLink).
At4g30010	S8	Unknown Protein	Unknown	unknown protein; FUNCTIONS IN: molecular_function unknown; INVOLVED IN: biological_process unknown; LOCATED IN: mitochondrion, plastid; EXPRESSED IN: 26 plant structures; EXPRESSED DURING: 15 growth stages; Has 39 Blast hits to 39 proteins in 18 species: Archae - 0; Bacteria - 0; Metazoa - 0; Fungi - 0; Plants - 39; Viruses - 0; Other Eukaryotes - 0 (source: NCBI BLink).
At1g57610	T11, S14, S15, T16	Unknown Protein	Unknown	Protein of unknown function (DUF607); CONTAINS InterPro DOMAIN/s: Protein of unknown function DUF607 (InterPro:IPR006769); BEST Arabidopsis thaliana protein match is: Protein of unknown function (DUF607) (TAIR:AT1G09575.1); Has 382 Blast hits to 382 proteins in 123 species: Archae - 0; Bacteria - 0; Metazoa - 148; Fungi - 56; Plants - 126; Viruses - 0; Other Eukaryotes - 52 (source: NCBI BLink).
At5g23200	T53	Unknown Protein	Unknown	unknown protein; BEST Arabidopsis thaliana protein match is: unknown protein (TAIR:AT5G08270.1); Has 30201 Blast hits to 17322 proteins in 780 species: Archae - 12; Bacteria - 1396; Metazoa - 17338; Fungi - 3422; Plants - 5037; Viruses - 0; Other Eukaryotes - 2996 (source: NCBI BLink).
At2g36500	S49	Unknown Protein	Unknown	CBS / octicosapeptide/Phox/Bemp1 (PB1) domains-containing protein; CONTAINS InterPro DOMAIN/s: Octicosapeptide/Phox/Bem1p (InterPro:IPR000270), Cystathionine beta-synthase, core (InterPro:IPR000644); BEST Arabidopsis thaliana protein match is: CBS / octicosapeptide/Phox/Bemp1 (PB1) domains-containing protein (TAIR:AT3G52950.2); Has 7037 Blast hits to 5620 proteins in 1431 species: Archae - 828; B…
At2g42310	S56	Unknown Protein	Unknown	unknown protein; BEST Arabidopsis thaliana protein match is: unknown protein (TAIR:AT3G57785.1); Has 115 Blast hits to 115 proteins in 48 species: Archae - 0; Bacteria - 0; Metazoa - 4; Fungi - 44; Plants - 67; Viruses - 0; Other Eukaryotes - 0 (source: NCBI BLink).
At2g40765	T4, K12, K14	Unknown Protein	Unknown	unknown protein; FUNCTIONS IN: molecular_function unknown; INVOLVED IN: biological_process unknown; LOCATED IN: mitochondrion, mitochondrial respiratory chain complex III; EXPRESSED IN: 24 plant structures; EXPRESSED DURING: 15 growth stages; Has 32 Blast hits to 32 proteins in 11 species: Archae - 0; Bacteria - 0; Metazoa - 0; Fungi - 0; Plants - 32; Viruses - 0; Other Eukaryotes - 0 (source: NC…
At4g26620	S21, S22, T25, S41, S46	Sucrase/ferredoxin-like family protein	Unknown	Sucrase/ferredoxin-like family protein; CONTAINS InterPro DOMAIN/s: Thioredoxin fold (InterPro:IPR012335), Sucraseferredoxin-like (InterPro:IPR009737), Thioredoxin-like fold (InterPro:IPR012336); BEST Arabidopsis thaliana protein match is: Sucrase/ferredoxin-like family protein (TAIR:AT5G55900.1); Has 30201 Blast hits to 17322 proteins in 780 species: Archae - 12; Bacteria - 1396; Metazoa - 17338…
At1g56000	K12, S15, S16, K22	FAD/NAD(P)-Binding Oxidoreductase Family Protein		FAD/NAD(P)-binding oxidoreductase family protein; FUNCTIONS IN: oxidoreductase activity; CONTAINS InterPro DOMAIN/s: FAD dependent oxidoreductase (InterPro:IPR006076), Adrenodoxin reductase (InterPro:IPR000759); BEST Arabidopsis thaliana protein match is: FAD/NAD(P)-binding oxidoreductase family protein (TAIR:AT1G55980.1); Has 2116 Blast hits to 2116 proteins in 458 species: Archae - 21; Bacteria…

## Sheet: Table S2
Supplementary Table S2: A list of experimentally-proven phosphorylation sites on the first 60 amino acid residues of mitochondrial respiratory apparatus.
Name of gene	AGI code	Complex	Experimentally proven phosphorylation sites
15kDa-1	At3g62790.1	I	NA
15kDa-2	At2g47690.1	I	NA
18 kDa	At5g67590.1	I	S58, K53
AGGG	At1g76200.1	I	NA
B17.2	At3g03100.1	I	NA
CA3	At5g66510.1	I	NA
CAL1	At5g63510.1	I	NA
CAL2	At3g48680.1	I	S48, K53
ND2	AtMg00285 / AtMg01320	I	NA
ND3	AtMg00990.1	I	NA
ND4	AtMg00580.1	I	NA
ND4L	AtMg00650.1	I	NA
TYKY-1	At1g79010.1	I	NA
B12-2	At2g02510.1	I	NA
ND1	AtMg00516 / AtMg01120 / AtMg01275	I	NA
MWFE	At3g08610.1	I	NA
24 kDa	At4g02580.1	I	NA
B14.5b	At4g20150.1	I	NA
B8	At5g47890.1	I	NA
At1g18320	At1g18320.1	I	NA
B16.6-1	At1g04630.1	I	NA
B16.6-2	At2g33220.1	I	S40, T42, S45, M47
B14	At3g12260.1	I	NA
B15	At2g31490.1	I	NA
ASHI	At5g47570.1	I	S10
	At1g72750.1	I	NA
B14.7	At2g42210.1	I	NA
ND9	AtMg00070.1	I	NA
B12-1	At1g14450.1	I	NA
ESSS-2	At3g57785.1	I	NA
13 kDa	At3g03070.1	I	NA
51 kDa	At5g08530.1	I	NA
TYKY-2	At1g16700.1	I	NA
75kDa	At5g37510.1	I	T22, S23
B9	At2g46540.1	I	NA
CA1	At1g19580.1	I	NA
CA2	At1g47260.1	I	NA
PDSW-2	At1g49140.1	I	NA
B18	At2g02050.1	I	NA
39 kDa	At2g20360.1	I	NA
P2	At2g27730.1	I	NA
ESSS-1	At2g42310.1	I	S56
GLDH	At3g47930.1	I	NA
KFYI	At4g00585.1	I	NA
B22	At4g34700.1	I	NA
B14.5a	At5g08060.1	I	NA
PSST	At5g11770.1	I	NA
B13	At5g52840.1	I	NA
ND7	AtMg00510.1	I	NA
P1	At1g67350.1	I	NA
SGDH	At1g67785.1	I	NA
PGIV-1	At3g06310.1	I	NA
PDSW-1	At3g18410.1	I	NA
MNLL	At4g16450.1	I	NA
PGIV-2	At5g18800.1	I	S2, S3, T8, T14, S15, T19, S21
ND5	AtMg00060 / AtMg00513 / AtMg00665	I	S37, S39, S40, Y58
ND6	AtMg00270.1	I	NA
SDH1-1	At5g66760.1	II	NA
SDH1-2	At2g18450.1	II	T22, S23, S26
SDH2-1	At3g27380.2	II	NA
SDH2-2	At5g40650.1	II	NA
SDH2-3	At5g65165.1	II	NA
SHD3	At4g32210.1	II	NA
SDH3-1	At5g09600.3	II	NA
SDH4	At2g46505.1	II	NA
SDH5	At1g47420.1	II	NA
SDH6	At1g08480.1	II	NA
SDH7	At3g47833.1	II	T20
SDH7	At5g62575.2	II	NA
SDH8	At2g46390.1	II	NA
QCR6-1, Hinge protein	At1g15120.1	III	NA
MPPalpha-1	At1g51980.1	III	NA
cytochrome b	At2g07727.1	III	NA
QCR10	At2g40765.1	III	T4, K12, K14
MPPbeta	At3g02090.1	III	NA
QCR8 (Isoforms: At3g10860, At5g05370)	At3g10860.1	III	NA
MPPalpha-2	At3g16480.1	III	NA
cytochrome c1-2	At3g27240.1	III	NA
QCR9	At3g52730.1	III	NA
QCR7-1 (14 kDa)	At4g32470.1	III	NA
	At5g05370.1	III	NA
iron-sulfur protein (Isoforms: At5g13430, At5g1344	At5g13430.1	III	NA
QCR7-2 (14 kDa)	At5g25450.1	III	NA
cytochrome c1-1	At5g40810.1	III	NA
cytochrome b	AtMg00220.1	III	NA
COX X 2-2	At1g01170.1	IV	NA
	At1g22450.1	IV	NA
	At1g22840.1	IV	NA
	At1g80230.1	IV	NA
COX X6	At2g16460.1	IV	NA
COX Vc	At2g47380.1	IV	NA
	At3g15640.1	IV	S21, S56
COX X2-1	At4g00860.1	IV	NA
	At4g10040.1	IV	NA
COX X4	At4g21105.1	IV	NA
	At4g37830.1	IV	T15, K20
COX Vc	At5g61310.1	IV	NA
COX2	AtMg00160.1	IV	NA
epsilon subunit	At1g51650.1	V	NA
alpha-2 subunit	At2g07698.1	V	NA
subunit 8 (At2g07707/AtMg00480)	At2g07707.1	V	S57, K58
subunit a (At2g07741/AtMg00410)	At2g07741.1	V	NA
subunit g (ATP20-1)	At2g19680.1	V	NA
FAD	At2g21870.1	V	NA
gamma subunit	At2g33040.1	V	NA
6 kDa subunit (At3g46430/At5g59613)	At3g46430.1	V	NA
subunit d	At3g52300.1	V	NA
subunit g (ATP20-2)	At4g26210.1	V	NA
subunit g (ATP20-3)	At4g29480.1	V	NA
ATP17 (plant specific)	At4g30010.1	V	S8
beta subunit (Isoforms: At5g08670, At5g08680, At5g	At5g08670.1	V	At5g08670 (S54, S58); At5g08680 (S3, S16); At5g08690 (S31)
OSCP	At5g13450.1	V	NA
delta subunit	At5g47030.1	V	NA
subunit b	AtMg00640.1	V	NA
alpha-1 subunit	AtMg01190.1	V	NA

## Sheet: Table S3
Supplementary Table S3: A list of 64 plant species used for WebLogo analysis.
Species
Arabidopsis thaliana
Arabidopsis lyrata
Brassica rapa
Brassica oleracea
Brassica napus
Thellungiella parvula
Thellungiella salsuginea
Tarenaya hassleriana
Carica papaya
Eucalyptus grandis
Gossypium raimondii
Theobroma cacao
Citrus sinensis
Vitis vinifera
Glycine max
Cajanus cajan
Phaseolus vulgaris
Lotus japonicus
Medicago truncatula
Cicer arietinum
Morus notabilis
Fragaria vesca
Prunus mume
Prunus persica
Pyrus x bretschneideri
Malus domestica
Populus euphratica
Populus trichocarpa
Ricinus communis
Manihot esculenta
Linum usitatissimum
Cucumis sativus
Cucumis melo
Citrullus lanatus
Beta vulgaris
Actinidia chinensis
Coffea canephora
Utricularia gibba
Sesamum indicum
Mimulus guttatus
Nicotiana sylvestris
Capsicum annuum
Solanum tuberosum
Solanum lycopersicum
Aquilegia coerulea
Nelumbo nucifera
Spirodela polyrhiza
Musa acuminata
Phoenix dactylifera
Elaeis guineensis
Phyllostachys edulis
Brachypodium distachyon
Aegilops tauschii
Triticum urartu
Triticum aestivum
Oryza sativa (Indica)
Zea mays
Sorghum bicolor
Panicum virgatum
Setaria italica
Amborella trichopoda
Picea abies
Selaginella moellendorffii
Physcomitrella patens

## Sheet: Table S4
Supplementary Table S4: A list of potential 14-3-3 binding sites on the N-terminal sequences of mitochondrial proteins.
Identifier	Site	Peptide_[-6:4]	ANN	PSSM	SVM	Consensus
AT1G01090.1	44	GSTRSLsLRRL	0.855	1.015	0.983	0.951
AT1G24180.1	12	LSSRSNtFLKP	0.668	0.968	0.502	0.713
AT1G24180.1	30	SIRRHVsTDSS	0.793	1.123	0.56	0.825
AT1G68010.2	20	GKYRVVsTKPM	0.801	0.853	0.641	0.765
AT3G02780.1	16	PLIRLRsLALS	0.64	0.959	0.263	0.621
AT3G02780.1	48	PNFRAFsGTAM	0.762	0.908	0.76	0.81
AT4G33760.1	17	RPTRFLsATAI	0.735	0.942	0.412	0.696
AT5G54770.1	43	LKPRSFsVRAT	0.825	1.098	1.188	1.037
AT5G54770.1	48	FSVRATtAGYD	0.821	1.019	0.637	0.826
AT1G69210.1	20	RASRRFtKPAT	0.932	1.518	1.59	1.347
AT2G26360.1	58	SCFRRKsNSDA	0.796	1	0.468	0.755
AT2G26360.1	60	FRRKSNsDACS	0.844	0.852	0.384	0.693
AT4G10040.1	51	FGRQSGtTPGY	0.886	0.897	0.959	0.914
AT4G34030.1	11	LGRRVVsASKE	0.743	0.98	0.448	0.724
AT1G01290.1	26	PIKRAFsSRID	0.873	1.028	1.008	0.97
AT2G26800.2	11	GVRRAHsIWCK	0.907	1.355	1.097	1.12
AT3G03070.1	23	SSRRNFsVATT	0.634	0.897	0.421	0.651
AT3G27380.1	30	IPARWTsTGAE	0.765	0.907	0.819	0.83
AT5G55200.1	40	VASRFHsLVHG	0.706	0.881	0.483	0.69
AT3G27560.1	49	GKYRNQtVAIK	0.795	0.882	0.691	0.789
AT1G70190.1	31	GGYRSYtQPAK	0.946	1.632	1.738	1.439
AT3G03420.1	22	GARRGKsIDEC	0.805	1.027	0.665	0.832
AT3G27570.1	38	FGVRKKtSMAE	0.636	0.912	0.499	0.682
AT4G10750.1	58	TPIRYSsSPAD	0.82	1.297	0.892	1.003
AT5G56010.1	50	DKIRFEsLTDK	0.896	0.963	0.719	0.859
AT1G70320.1	9	LRRRRAsEVPT	0.885	1.47	1.199	1.185
AT3G27620.1	46	GGLRDFsKMTF	0.626	0.817	0.448	0.63
AT4G11010.1	10	QICRSAsKAAK	0.848	1.128	1.018	0.998
AT1G02410.1	36	LCSRYYtHGAC	0.78	1.006	0.699	0.828
AT2G27730.1	15	IVSRRFsSGKV	0.736	0.993	0.467	0.732
AT3G27890.1	24	GSLRKTsFHTG	0.74	0.846	0.517	0.701
AT5G56730.1	57	YYVRRNsKPRM	0.945	1.506	1.437	1.296
AT3G28520.1	39	KLFRRDsNFVY	0.829	1.034	0.431	0.765
AT4G11170.1	52	HIKRSHtIGHE	0.867	1.281	1.378	1.175
AT4G35650.1	7	MARRSVsIFNR	0.939	1.381	1.438	1.253
AT4G35650.1	28	SLSRSItYMPR	0.757	0.978	0.644	0.793
AT4G35650.1	42	GAPRTVtLIPG	0.697	0.862	0.549	0.703
AT1G71310.2	38	KGVRRFsTETE	0.641	0.892	0.338	0.624
AT1G71310.2	39	GVRRFStETEN	0.842	1.154	0.563	0.853
AT2G29080.1	14	KLNRSIsRSKG	0.708	0.938	0.349	0.665
AT2G29080.1	33	SAARLLtSPGL	0.604	1.097	0.392	0.698
AT3G04950.1	46	QQQRSItSTAP	0.749	1.034	0.792	0.858
AT5G57300.1	7	MALRSVsRRLG	0.88	0.987	0.918	0.928
AT1G03090.2	26	MLVRYIsGSAS	0.716	0.966	0.555	0.746
AT1G71730.1	5	--MRLHsAITL	0.614	0.888	0.256	0.586
AT1G72170.1	53	PVTRWAsIALG	0.624	0.882	0.452	0.653
AT3G05780.1	8	MPKRFNtSGFD	0.797	0.918	0.455	0.723
AT3G05780.1	44	YGARHVtPPAI	0.927	1.233	1.584	1.248
AT3G05780.1	52	PAIRIGsNPVQ	0.746	1.199	0.504	0.816
AT4G11600.1	47	NSHRIIsLPIS	0.902	1.311	1.302	1.172
AT4G35850.1	27	SRRYFAsSPEE	0.791	0.871	0.274	0.645
AT5G20250.4	32	HRFSSSsLPFK	0.7	0.832	0.615	0.716
AT5G57590.1	24	HRIRFKsTSVS	0.578	1.116	0.319	0.671
AT1G72270.1	30	PLLRRLsSAAA	0.771	1.024	0.767	0.854
AT1G72270.1	31	LLRRLSsAAAV	0.745	1.123	0.386	0.751
AT2G29720.1	36	TTTRAEtSGVD	0.749	0.89	0.418	0.686
AT3G45300.1	21	VKTRRRsFSSR	0.717	1.006	0.572	0.765
AT3G45300.1	23	TRRRSFsSRSS	0.812	1.378	0.929	1.04
AT3G45300.1	28	FSSRSSsLLFD	0.73	1.003	0.706	0.813
AT4G12080.1	16	EAVRSTtGNDG	0.792	1.045	0.933	0.923
AT4G12080.1	41	VAQRSEsSNQS	0.692	0.926	0.439	0.686
AT4G35860.1	49	FGARMVtVDGR	0.835	0.881	1.051	0.922
AT5G20290.1	14	IHKRRAtGGKQ	0.805	0.974	0.525	0.768
AT4G12130.1	11	NFRREIsKYTG	0.851	1.062	0.842	0.918
AT1G04630.1	40	RYARRIsNTGP	0.811	0.917	0.561	0.763
AT1G04630.1	42	ARRISNtGPSA	0.854	1.063	0.749	0.889
AT3G45740.1	27	PPSRSFsSTIS	0.757	0.975	0.54	0.757
AT4G36400.1	35	SVSRSVsGFVN	0.737	0.995	0.595	0.776
AT4G12340.1	30	KRRAKKtKPKV	0.766	0.849	0.395	0.67
AT4G36680.1	16	LVRRFAsAAAD	0.841	1.187	0.806	0.945
AT5G23140.1	31	TGRRSYsLIPM	0.906	1.37	1.728	1.335
AT5G58270.1	51	NYIRRNsIRTS	0.768	0.968	0.52	0.752
AT4G13360.1	39	SDRRKFsAMAG	0.656	1.051	0.333	0.68
AT2G30920.1	22	SARRLSsSPII	0.865	1.381	0.844	1.03
AT4G37040.1	41	LGRRHVsMQLS	0.873	1.239	0.958	1.023
AT1G31160.1	15	LLLRNFsTVGR	0.746	0.922	0.827	0.832
AT1G73940.1	35	LLVRYMsRERA	0.721	0.887	0.4	0.669
AT2G31060.3	19	TTRRSFsSHSS	0.798	1.211	0.705	0.905
AT2G31060.3	38	SSLRSFsAATA	0.658	0.917	0.421	0.665
AT4G37830.1	15	ALSRAVtRAAP	0.78	0.824	0.509	0.704
AT4G37830.1	30	APKRNFsSSAG	0.616	0.819	0.374	0.603
AT5G23300.1	7	MAGRAAtSSAK	0.663	0.888	0.313	0.621
AT5G23300.1	22	FLFRRVsSNPL	0.902	1.18	1.141	1.074
AT5G23300.1	23	LFRRVSsNPLG	0.92	1.516	1.252	1.229
AT1G31760.1	40	FKTRPVsQQLA	0.828	0.891	0.774	0.831
AT3G47833.1	54	SLRRFKsHKKG	0.854	1.142	0.842	0.946
AT5G58990.1	15	AISRTEtVGAF	0.603	0.949	0.361	0.638
AT1G07025.1	52	MLHRSYsQRHV	0.8	1.117	0.684	0.867
AT1G74230.1	32	QSIRCMsSSKI	0.624	0.878	0.316	0.606
AT2G31170.1	22	TPIRFSsLPKS	0.781	1.248	0.643	0.891
AT2G31170.1	47	QLRRCFtTLSS	0.752	1.124	0.594	0.823
AT3G07770.1	10	LSKRSVsTLLR	0.826	1.02	0.931	0.926
AT3G07770.1	43	DVKRSDtESRW	0.744	0.965	0.34	0.683
AT4G37930.1	11	MALRRLsSSID	0.666	0.906	0.335	0.636
AT4G37930.1	12	ALRRLSsSIDK	0.736	1.009	0.514	0.753
AT4G37930.1	26	PLIRSTsCYMS	0.827	1.212	0.828	0.956
AT3G08580.1	42	MYQRHAtYGNY	0.893	1.203	0.77	0.955
AT3G48000.1	7	MAARRVsSLLS	0.757	0.964	0.479	0.733
AT3G48000.1	8	AARRVSsLLSR	0.669	0.962	0.328	0.653
AT3G48000.1	15	LLSRSFsASSP	0.596	1.031	0.44	0.689
AT3G48000.1	17	SRSFSAsSPLL	0.738	0.899	0.41	0.682
AT3G48000.1	40	ILRRFGtSSAA	0.781	1.029	0.624	0.811
AT4G38070.1	26	IDYRNKtELLE	0.586	0.83	0.475	0.63
AT3G48680.1	14	ISKRSItSAVS	0.764	0.937	0.675	0.792
AT1G76030.1	23	MEYRTVsGVAG	0.679	0.963	0.491	0.711
AT4G14790.1	12	VRLRKVsALGI	0.721	1.011	0.555	0.762
AT4G39260.1	27	DLQRTFsQFGD	0.775	1.001	0.589	0.788
AT1G07830.1	21	ASARSEsTTAA	0.786	0.93	0.689	0.802
AT1G07830.1	35	STIRTPtNPLE	0.714	1.188	0.27	0.724
AT3G49010.1	50	IFPRPTsGPLR	0.832	1.195	1.177	1.068
AT4G39660.1	13	LLKRATsDIYH	0.756	0.928	0.575	0.753
AT4G39660.1	22	YHRRAIsLLRT	0.864	1.106	0.698	0.889
AT5G26200.1	15	EKRRATtSSSS	0.691	1.057	0.5	0.749
AT1G33360.1	45	IQERFKsEQGG	0.802	0.902	0.975	0.893
AT3G49240.1	35	LAVRYMsFATQ	0.65	0.879	0.385	0.638
AT4G15640.1	12	NSRRIAtVLKP	0.637	0.966	0.396	0.666
AT1G34065.1	22	TLVRSSsSHMD	0.754	1.005	0.573	0.777
AT1G34065.1	39	SIDRSQtAMPD	0.734	1.077	0.541	0.784
AT2G31955.1	6	-MRRCFsKITD	0.843	1.161	1.103	1.036
AT5G26860.1	47	WNRRSTsLGHR	0.925	1.296	1.805	1.342
AT5G26860.1	56	HRAFFCsEPTN	0.789	0.843	0.373	0.668
AT1G78120.1	34	PRRRKPsLPEK	0.961	1.797	1.929	1.562
AT2G33040.1	44	LGVRSIsTQVV	0.775	1.058	0.646	0.826
AT2G33040.1	54	VRNRMKsVKNI	0.797	1.117	0.802	0.905
AT3G49910.1	31	ERRVIMsSPLS	0.67	0.982	0.465	0.706
AT4G16580.1	57	NERRNLsVIGA	0.687	0.973	0.678	0.779
AT2G33210.1	19	RIARKCtSQIG	0.752	0.903	0.332	0.662
AT5G01340.1	7	MATRTEsKKQI	0.642	0.877	0.526	0.682
AT2G33220.1	40	RYARRIsNTGP	0.811	0.917	0.561	0.763
AT2G33220.1	42	ARRISNtGPSA	0.854	1.063	0.749	0.889
AT1G08220.1	15	LKHRSVsALNK	0.834	1.107	0.696	0.879
AT1G08220.1	47	PALRSTtRSFL	0.569	0.856	0.309	0.578
AT1G79010.1	35	HLSRLQsRGIS	0.667	0.872	0.344	0.628
AT2G33800.1	43	FLNRRFsSLTL	0.766	1.151	0.614	0.844
AT2G33800.1	44	LNRRFSsLTLV	0.802	1.01	0.528	0.78
AT3G51790.1	11	LLFRRSsQILR	0.698	1.005	0.503	0.735
AT3G51790.1	58	TFLRSLsIARR	0.589	0.847	0.467	0.634
AT5G28460.1	13	ISRRQNsYILL	0.73	1.073	0.605	0.803
AT5G28460.1	27	RFLRRFsYDVD	0.853	1.157	1.119	1.043
AT5G61880.1	22	IIARACtQAYR	0.782	0.872	0.344	0.666
AT1G44575.1	47	LPSRRQsFVPL	0.699	0.991	0.675	0.788
AT5G02050.1	11	TVFRRAsSTVA	0.754	0.974	0.435	0.721
AT5G02050.1	12	VFRRASsTVAN	0.819	1.163	0.867	0.95
AT5G61990.1	11	MLFRKRtLVTR	0.786	1.057	0.693	0.845
AT5G61990.1	25	LLFRSFsVNVE	0.874	1.254	1.279	1.136
AT2G34050.1	34	FTARSSsWQRD	0.808	1.102	0.779	0.896
AT5G02130.1	22	IRGRTIsVRGN	0.662	1.001	0.537	0.733
AT5G35360.3	51	PRQRTQtLKVS	0.724	1.272	0.835	0.944
AT1G45332.1	6	-MARFPtSPAP	0.786	1.227	0.769	0.927
AT1G45332.1	18	RLLRLFsSNKR	0.686	0.95	0.516	0.717
AT1G45332.1	42	QLIRHFsAGTA	0.813	1.084	0.785	0.894
AT1G79440.1	35	SQCRQMsMDAQ	0.596	1.065	0.255	0.639
AT2G34630.2	19	KFLRNRsFYGS	0.636	0.832	0.445	0.638
AT3G10690.1	51	LCRLRRtEPSA	0.788	0.897	0.373	0.686
AT4G17170.1	49	FGARMItIDNK	0.697	0.835	0.586	0.706
AT5G37510.2	32	FLRTIVsKPEL	0.929	0.939	1.177	1.015
AT1G47260.1	27	ALDRVGsLLQG	0.733	0.835	0.34	0.636
AT1G47260.1	44	HLSRHRtLMNV	0.805	1.156	0.549	0.837
AT3G52200.2	54	NGVRSAsIDLI	0.851	1.156	1.196	1.068
AT4G17300.1	23	STLRFLsFFTI	0.612	0.813	0.301	0.575
AT1G09300.1	13	NLVRRVsRTQV	0.905	0.985	0.656	0.849
AT1G47420.1	44	HLSRHRtLITV	0.763	1.082	0.682	0.842
AT4G17360.1	7	MIRRVStTSCL	0.739	1.189	0.483	0.804
AT4G17360.1	20	TAFRSFtKWSF	0.667	1.018	0.578	0.754
AT5G62530.1	14	RALRAKsLCDK	0.892	0.993	1.165	1.017
AT3G11630.1	54	GFARRSsLSST	0.662	0.932	0.618	0.737
AT3G52530.1	41	NPIRMFsSDQI	0.696	0.853	0.584	0.711
AT5G39840.1	14	VLRRAYsSRVT	0.865	1.191	1.073	1.043
AT5G62575.2	56	ALKRFKsHKKS	0.773	0.921	0.633	0.776
AT1G10270.1	12	LLRRLCtTTTT	0.827	1.044	0.581	0.817
AT1G80230.1	7	MWRRIVsSHLK	0.89	1.176	1.061	1.042
AT1G80230.1	42	LSTRASsIPAY	0.882	1.353	1.31	1.182
AT1G48420.1	7	MRGRSLtLSRV	0.791	1.268	0.634	0.898
AT1G48420.1	21	LARRSMsATSV	0.892	1.373	0.863	1.043
AT4G20020.1	24	YVNRSIsSSIT	0.573	0.899	0.312	0.595
AT3G52930.1	42	IGKRLAsINVE	0.698	0.822	0.564	0.695
AT1G48520.1	27	LLRRRRsNNFS	0.811	1.209	0.674	0.898
AT5G63510.2	14	LSRRGVtSNLI	0.826	1.03	0.948	0.935
AT1G11630.1	9	FLFRIRtSEFI	0.624	0.96	0.368	0.651
AT4G20930.1	8	AIRRAQtLLCL	0.905	1.384	1.214	1.168
AT5G04750.1	40	PAIRYFsDDKG	0.735	0.956	0.407	0.699
AT5G04750.1	48	DKGRVLsEEER	0.727	0.933	0.345	0.668
AT5G63620.1	11	PILRRAsAVKN	0.839	1.165	0.607	0.87
AT1G49630.1	50	NIRRLStLEAA	0.832	1.194	0.993	1.006
AT3G12650.1	9	ISRRLVsKFLK	0.854	0.962	0.881	0.899
AT3G12650.1	54	GLLRSFsVFNI	0.94	1.378	1.523	1.28
AT4G21090.2	24	PRERHLsMCGK	0.6	1.002	0.283	0.628
AT5G41480.1	24	PRMRRIsAANL	0.833	1.35	0.7	0.961
AT5G63980.1	24	VAVRTNsRPRN	0.813	1.196	0.448	0.819
AT5G63980.1	53	VTLRVVsSMAY	0.813	0.86	0.481	0.718
AT1G11870.2	51	LLVRAFsASAA	0.769	1.076	0.78	0.875
AT3G12780.1	56	LDSRRFsLHVA	0.789	1.033	0.923	0.915
AT3G55400.1	34	FSFRRNsFRFS	0.825	1.001	0.599	0.808
AT5G41670.1	40	VYNRTTsKVDE	0.609	0.885	0.314	0.603
AT1G12775.1	10	MMIRRLsSQAS	0.661	1.185	0.479	0.775
AT1G12775.1	47	CCERGFsTFSD	0.606	0.862	0.381	0.616
AT2G36500.1	14	SGRRSIsSIRR	0.815	1.125	0.836	0.925
AT3G13110.1	11	TSRRHFtMSLY	0.795	1.193	0.548	0.845
AT3G55410.1	50	CRPKAQsAPVP	0.772	0.817	0.399	0.663
AT1G12840.1	48	PNLRVGtLDSL	0.61	0.826	0.437	0.624
AT3G13150.1	33	AKPRSQtKSTK	0.743	0.915	0.627	0.762
AT5G64670.1	54	STSRALsFQGI	0.73	0.865	0.582	0.726
AT1G13280.1	57	TRARSTtSSTG	0.704	1.133	0.69	0.842
AT2G04540.1	11	NLRRHLsASRL	0.799	1.147	0.5	0.815
AT3G13160.1	25	TNRRFFsAVTA	0.703	0.988	0.436	0.709
AT3G55605.1	12	CIRRSAsTLAS	0.924	1.463	1.366	1.251
AT5G05990.1	10	LVRRAAsRFVG	0.856	1.162	0.864	0.961
AT5G05990.1	39	GRRRHLtPSVD	0.702	1.068	0.371	0.714
AT5G05990.1	59	KKRASPtDPLL	0.931	0.979	1.052	0.987
AT5G64970.1	16	EAIRSEsLDHN	0.774	1.076	0.836	0.895
AT1G50940.1	11	VLLRALtKNKF	0.652	0.906	0.61	0.723
AT1G50940.1	36	SLSRCIsTLIL	0.725	0.868	0.308	0.634
AT2G04940.1	10	LSRRSLsSLLR	0.705	1.155	0.709	0.856
AT2G38040.1	27	DYLRSSsNGVN	0.822	1.085	0.587	0.831
AT5G42150.1	5	--MRRVtGLAA	0.805	0.879	0.749	0.811
AT2G05710.1	23	ASSRSSsLFSF	0.622	0.903	0.566	0.697
AT5G42650.1	28	LKFRVLtRPIK	0.895	1.242	0.975	1.037
AT5G65720.1	15	TIRRTLtKPHG	0.875	1.564	1.315	1.251
AT2G05990.1	19	TRRPSMsSPSK	0.819	1.072	0.792	0.894
AT2G05990.1	60	GCLRNHsAVPT	0.777	0.996	0.44	0.738
AT2G38550.1	24	LLYRAHsRPPV	0.932	1.496	1.229	1.219
AT2G38550.1	45	PSRRHFsAPRA	0.953	1.594	1.495	1.347
AT3G56210.5	26	PRSRNFsSSNK	0.595	0.992	0.256	0.614
AT4G23620.2	8	LLRRAKtLPKT	0.974	1.845	2.471	1.763
AT5G06580.1	12	KFARSKtILSF	0.591	0.976	0.742	0.77
AT5G06580.1	25	PCRQLHsTPKS	0.797	0.803	0.299	0.633
AT5G06580.1	47	GRRRLPtCWSS	0.782	1.306	0.431	0.84
AT1G14140.1	30	MVAESVtFPID	0.904	0.859	1.108	0.957
AT5G07320.1	40	REIRIRsLFDF	0.741	1.019	0.648	0.803
AT5G66510.2	44	QLSRHRtLMNV	0.8	1.076	0.405	0.76
AT1G52280.1	58	IDDRIFtLQIW	0.698	0.879	0.77	0.782
AT2G39270.1	12	RLLRPAtTTIK	0.821	0.849	0.588	0.753
AT3G56940.1	32	LSGRRFsTVIR	0.664	0.934	0.477	0.692
AT5G07340.2	7	MRERIItFVSL	0.762	1.207	0.918	0.962
AT2G07681.1	8	DLLYSMtKPES	0.906	0.929	1.076	0.97
AT2G07681.1	57	SANRSIsSFGR	0.654	0.873	0.399	0.642
AT4G23760.1	40	VSLRNPsLGFI	0.788	0.811	0.89	0.83
AT5G07440.1	15	RNFRHAsRILG	0.673	0.84	0.28	0.598
AT5G66760.1	6	-MWRCVsRGFR	0.715	0.897	0.412	0.675
AT5G66760.1	33	RFSRFFsTGST	0.58	0.837	0.296	0.571
AT2G07687.1	47	GGARLLsLGLI	0.809	0.997	0.958	0.921
AT2G39795.1	13	VVRRSAsKFAS	0.91	1.369	1.394	1.224
AT2G39795.1	27	GRVRSIsAVAN	0.904	1.459	1.085	1.149
AT5G66860.1	12	RGLRSVtAEVA	0.875	1.13	1.001	1.002
AT1G14610.1	46	HGSRTMsESEK	0.605	1.005	0.508	0.706
AT4G23900.1	10	QICRSAsRAAR	0.83	1.107	0.861	0.933
AT5G08300.1	20	SKARRCsTGGS	0.865	0.995	0.708	0.856
AT5G08300.1	21	KARRCStGGSE	0.65	0.881	0.288	0.606
AT1G53240.1	23	VIRRSFsSGSV	0.872	1.364	0.977	1.071
AT3G58610.1	51	KSLRSLtATVA	0.702	0.952	0.442	0.699
AT5G08530.1	15	GLQRAVsIWKE	0.903	1.069	0.897	0.956
AT5G08530.1	31	PALRSFsTQAA	0.849	1.126	1.166	1.047
AT1G14810.1	27	AKPRHFsARVK	0.744	0.883	0.378	0.668
AT1G53460.1	33	IVSRNFtSEEA	0.615	0.801	0.453	0.623
AT3G15020.1	11	MIVRSAsPVKQ	0.646	0.894	0.29	0.61
AT2G41250.1	9	LRIRKAtTTLL	0.648	1.092	0.358	0.699
AT5G44730.2	13	SKLRCItVDVT	0.806	0.923	0.721	0.817
AT1G15220.1	22	ARARNIsHNVR	0.824	1.106	0.969	0.966
AT1G53645.1	10	AIGRRFsNPNG	0.917	1.564	1.061	1.181
AT3G15590.1	57	GLVRLYsARDV	0.827	1.06	0.474	0.787
AT3G15640.1	7	MWRRIVsSQLK	0.886	1.169	1.107	1.054
AT2G42310.1	24	IFSRSGsTSAG	0.724	0.969	0.736	0.81
AT3G15660.1	40	MMRFSStVPSD	0.816	1.077	0.812	0.902
AT3G60100.1	8	VFFRSVsAISR	0.794	1.082	0.904	0.927
AT5G08740.1	55	YLSRAVtNNSG	0.815	0.951	0.715	0.827
AT5G47030.1	27	VTTRAFsTELP	0.585	0.836	0.256	0.559
AT1G15480.1	13	VLRRSQsLRLG	0.96	1.453	1.865	1.426
AT4G26620.1	43	PTSRSGsFQSE	0.733	0.957	0.538	0.743
AT1G54220.1	45	PLNREDtFNSR	0.729	0.893	0.379	0.667
AT5G47320.1	30	GSLRYMsTKLY	0.795	0.987	0.592	0.791
AT2G42790.1	33	AIERWCtSADT	0.736	0.845	0.297	0.626
AT3G17240.1	19	FLTRNIsNSPT	0.623	0.815	0.344	0.594
AT3G61050.1	26	GWSRMMtHRSS	0.663	0.848	0.318	0.61
AT4G26780.1	40	FSSRFHsLAHD	0.782	0.951	0.714	0.816
AT5G47435.2	6	-MIRRItERAS	0.793	1.084	0.714	0.864
AT1G55510.1	13	RSCRKLsFPSL	0.792	1.302	0.801	0.965
AT1G55510.1	25	HGARRVsTETG	0.808	0.998	0.899	0.902
AT1G55510.1	26	GARRVStETGK	0.828	0.982	0.563	0.791
AT2G17130.1	27	IQTRSVtYMPR	0.815	0.969	1.068	0.951
AT2G17130.1	41	GKPRPVtLIPG	0.845	0.877	0.971	0.898
AT1G16700.1	11	LARRSFsALRA	0.838	1.213	0.834	0.962
AT1G16700.1	39	LQSRAIsYGSN	0.558	0.833	0.395	0.595
AT1G55550.1	6	-MERTRsKPVR	0.791	1.375	0.836	1.001
AT2G17270.1	6	-MTRVKsKLDE	0.716	0.9	0.558	0.725
AT3G17910.1	14	ILTRSNtKRYW	0.906	1.132	1.189	1.076
AT3G17910.1	41	FWSRHFsAVAD	0.81	1.166	0.786	0.921
AT3G61440.1	13	RLLRREtIPCF	0.915	1.568	1.372	1.285
AT3G61440.1	54	NAKRDAsLLIG	0.809	0.904	0.642	0.785
AT4G26910.1	12	VIRRAAsNGSS	0.832	1.181	0.657	0.89
AT5G09600.1	17	RRRDVVsAPLS	0.897	1.023	0.525	0.815
AT1G16880.1	55	ERLRLStLKIR	0.608	1.017	0.544	0.723
AT1G55890.1	21	CPIRRFsSAAT	0.683	0.985	0.571	0.746
AT3G18240.1	10	ALLRNAsLCAR	0.882	1.023	1.159	1.021
AT3G18240.1	48	PKFRFFsSESG	0.638	0.894	0.253	0.595
AT4G26970.1	6	-MYRRAtSGVR	0.78	1.078	0.619	0.826
AT4G26970.1	7	MYRRATsGVRS	0.869	1.149	0.787	0.935
AT4G26970.1	13	SGVRSAsARLS	0.706	0.989	0.373	0.689
AT4G26970.1	48	QTNRSKsFSSA	0.732	1.012	0.726	0.823
AT1G55900.1	26	RNLRCFsAEAS	0.712	0.945	0.521	0.726
AT2G18450.1	16	SSRRSEsNGAF	0.84	1.199	0.776	0.938
AT2G18450.1	30	QLSRFFsAPPS	0.874	1.371	0.965	1.07
AT2G44065.1	31	PAFRNFsTGFA	0.668	0.812	0.446	0.642
AT1G56070.1	23	HNIRNMsVIAH	0.577	0.944	0.58	0.7
AT2G44350.2	8	VFFRSVsAFTR	0.897	1.117	1.147	1.054
AT5G09840.1	29	SHRRTItLFIT	0.796	1.105	0.58	0.827
AT5G48030.1	19	LSRRCLsSSLI	0.694	0.978	0.558	0.743
AT1G18080.1	15	GTMRAHtDMVT	0.837	1.13	0.595	0.854
AT1G18320.1	22	CAVRAVtSGVM	0.834	0.94	0.757	0.844
AT2G44525.1	7	MAMRLKsMATL	0.597	1.002	0.346	0.648
AT2G44525.1	38	SLRRAFsLYDQ	0.942	1.374	1.435	1.25
AT3G19170.1	6	-MLRTVsCLAS	0.573	0.978	0.269	0.607
AT3G19170.1	49	RNLRRIsSPSV	0.883	1.362	0.9	1.048
AT5G10860.1	41	FCSRSEsTQPA	0.802	1.029	0.597	0.809
AT5G48970.1	36	GVSRSVtSPLD	0.962	1.594	1.742	1.433
AT1G56560.1	40	DLSRTTsIRHL	0.582	0.81	0.395	0.596
AT2G44620.1	35	GTIRSFsSHDD	0.903	1.222	1.074	1.066
AT3G19480.1	19	SSSRLVtTPSS	0.669	1.058	0.276	0.668
AT5G49210.1	15	RFVRRQsENAS	0.87	1.231	1.166	1.089
AT5G49210.1	28	GSLRSFsADAT	0.871	1.19	1.156	1.072
AT2G20270.2	59	PPLRCSsVKAM	0.656	0.836	0.532	0.675
AT5G49555.1	7	MWRRSFsTLPK	0.87	1.327	1.103	1.1
AT2G44950.1	15	RKRRHFsSISP	0.781	1.158	0.735	0.891
AT4G28220.1	13	LGRASRsAPLA	0.827	0.891	0.701	0.806
AT5G49970.1	9	NVIRRVtTMTF	0.75	0.975	0.539	0.755
AT5G49970.1	10	VIRRVTtMTFT	0.733	1.095	0.459	0.762
AT2G45030.1	6	-MARFPtSPAP	0.786	1.227	0.769	0.927
AT2G45030.1	18	LLLRLFsSNKR	0.621	0.9	0.491	0.671
AT2G45030.1	42	HLIRHFsAGTA	0.817	1.164	0.929	0.97
AT3G19820.1	16	RPKRKKtWVDY	0.814	1.076	0.765	0.885
AT4G00530.1	13	KVVRRTtMVAT	0.648	1.093	0.478	0.74
AT2G20510.1	46	TSHRRFsVFTE	0.638	0.871	0.39	0.633
AT4G00570.1	26	GSRRCFsTAIP	0.826	1.004	0.622	0.817
AT5G13120.1	40	FRLRTKsSFDS	0.757	1.25	0.88	0.962
AT5G50370.1	31	RRMKCAsKPDK	0.918	0.901	0.97	0.93
AT1G19520.1	29	TFCRNFsAITS	0.617	0.876	0.415	0.636
AT4G00585.1	37	KHWRRNtAIAM	0.757	1.213	0.468	0.813
AT1G19580.1	44	QLSRHRtLMNV	0.8	1.076	0.405	0.76
AT2G20800.1	12	FYQRASsLFKA	0.836	1.094	0.937	0.956
AT3G21390.1	33	AISRMVtSPLD	0.927	1.309	1.263	1.166
AT5G13430.1	11	AGRRLFsVSQR	0.688	0.972	0.524	0.728
AT5G13430.1	29	VVSRDHtLSDG	0.774	0.974	0.673	0.807
AT2G46390.1	7	MIYRKWsLLSG	0.61	0.939	0.376	0.642
AT3G21400.1	58	DKGRRTsEDNV	0.882	1.204	0.704	0.93
AT5G13440.1	11	AGRRLFsVSQR	0.688	0.972	0.524	0.728
AT5G13440.1	29	VLSRDHtLSDG	0.878	1.069	0.96	0.969
AT5G50950.1	36	QERRSYsTPFR	0.946	1.767	1.769	1.494
AT3G22300.1	10	GVLRRSsLPSR	0.925	1.533	1.492	1.317
AT5G13450.1	28	SSVRSKsLFPA	0.83	1.034	1.132	0.999
AT1G20430.1	58	LSFRSVsQKYR	0.774	0.918	0.59	0.761
AT4G01310.1	31	SSARMLsPPLR	0.566	0.851	0.338	0.585
AT1G63770.5	12	IPCRSSsLARV	0.801	0.925	0.465	0.73
AT4G30010.1	8	ALRRVYsEIRG	0.878	1.237	1.023	1.046
AT5G13610.1	54	IPTRCFsNVVA	0.676	0.842	0.423	0.647
AT5G51220.1	10	RLARVVtQTSK	0.783	0.821	0.338	0.647
AT5G51220.1	19	SKLRSLtTNGS	0.72	0.977	0.694	0.797
AT3G22360.1	45	GVVRVFsKMTF	0.595	0.874	0.289	0.586
AT5G51740.1	59	VGLRSWtSLGR	0.666	0.864	0.6	0.71
AT3G22370.1	56	IWTRAPtIGGM	0.766	0.845	0.858	0.823
AT5G51960.1	56	NLARNYtYLLN	0.659	0.983	0.625	0.756
AT1G20720.1	53	FMSRVIsTLDR	0.673	1.012	0.339	0.675
AT1G21400.1	10	WFARSKtLVSS	0.833	1.148	1.394	1.125
AT1G21400.1	31	LIKRDYsHRPI	0.764	0.945	0.967	0.892
AT1G64880.1	9	LRTRASsWPRL	0.887	1.625	1.28	1.264
AT2G47690.1	13	PKTRTRtIFDE	0.723	0.962	0.603	0.763
AT3G23830.1	34	GSLRYMsSKLF	0.645	0.904	0.415	0.655
AT4G03240.1	56	SRIRHDsLTTR	0.799	1.07	0.482	0.784
AT1G21750.1	7	MAMRGFtLFSI	0.692	1.018	0.8	0.837
AT1G65290.1	37	ILLRRFsEEVR	0.881	1.24	1.233	1.118
AT3G24200.2	26	ILQRTCsTVVT	0.729	1.001	0.42	0.717
AT4G05020.2	5	--MRNFsVFER	0.766	0.853	0.743	0.787
AT5G14580.1	12	NRASSAsLPNF	0.861	1.005	0.957	0.941
AT1G65540.1	11	ALLRRRsYDVV	0.761	1.065	0.383	0.736
AT2G24120.1	42	ALFRRKtLPFF	0.963	1.641	1.967	1.524
AT2G24120.1	50	PFFERHsLPIS	0.869	0.862	0.806	0.846
AT1G22660.1	5	--MRLSsLPIN	0.881	1.248	1.024	1.051
AT1G22660.1	34	NLNRSLtVASR	0.621	1.027	0.492	0.713
AT3G01800.1	11	FVRRALsSRNA	0.781	1.128	0.591	0.833
AT3G01800.1	23	GFLRRSsVVVQ	0.724	0.992	0.493	0.736
AT5G53350.1	9	AALRSNtSRET	0.791	0.9	0.541	0.744
AT5G53350.1	31	IFNRIHtARTA	0.78	0.912	0.724	0.805
AT5G53350.1	36	HTARTAtSPPH	0.764	1.229	0.675	0.889
AT5G53350.1	47	CNHRSKsDEKF	0.694	1.014	0.708	0.805
AT1G22800.1	6	-MRRINsLYGR	0.899	1.221	1.28	1.133
AT2G25140.1	31	PLLRSRsLSSS	0.749	1.13	0.754	0.878
AT3G01910.1	19	EPPRHPsLKVN	0.568	0.843	0.262	0.558
AT5G53460.1	45	GVSRRRsCTAR	0.819	1.144	0.642	0.868
AT5G53460.1	47	SRRRSCtARCS	0.905	1.5	0.86	1.088
AT2G25530.1	54	NRDRKAsLQRR	0.816	1.068	0.671	0.852
AT5G15220.1	15	SICRRVsLREL	0.923	1.137	1.133	1.064
AT5G15220.1	48	VFKRWAtKKTA	0.777	0.873	0.86	0.837
AT2G25840.2	23	RFSRLGsLTRL	0.716	0.803	0.303	0.607
AT2G25840.2	29	SLTRLLsKPTS	0.756	1.237	0.676	0.89
AT3G02490.1	38	NSTRSFsSFLH	0.667	0.927	0.533	0.709
AT3G25860.1	50	SHRRSMtVRSK	0.815	1.239	0.671	0.908
AT5G53650.1	11	FRVRLAsFFAG	0.851	1.301	0.943	1.032
AT5G53650.1	55	LDRRIStLESL	0.565	1.005	0.609	0.726
AT1G23800.1	7	MASRRVsSLLS	0.73	0.933	0.341	0.668
AT1G23800.1	8	ASRRVSsLLSR	0.664	0.948	0.363	0.658
AT2G26080.1	56	HRRRDVsGSAF	0.812	1.28	0.982	1.025
AT1G67630.1	30	ILKRCVtLCIN	0.941	1.035	1.41	1.129
AT2G26140.1	8	AWRRIItKVSS	0.651	1.01	0.478	0.713
AT2G26140.1	29	LLVRAYsSFPR	0.734	1.012	0.817	0.854
AT2G26140.1	54	PRTRFQsSYVG	0.688	1.097	0.439	0.741
AT3G26780.1	34	DNGRSNtRQLD	0.808	0.966	0.578	0.784
AT5G15980.1	37	ISSRSFsSFIH	0.714	0.859	0.542	0.705
AT5G54580.1	15	AISRAVtEVAS	0.842	1.062	0.799	0.901

## Sheet: Table S5
Supplementary Table S5. A list of potential 14-3-3 binding sites on the N-terminal sequences of some mitochondrial proteins examined in this study
Name of protein	AGI code	14-3-3 binding site	Predicted phosphopeptide	ANN - Artificial Neural Network (cut-off = 0.55)	PSSM - Position-Specific Scoring Matrix (cut-off = 0.80)	SVM - Support Vector Machine (cut-off = 0.25)	Consensus - Average of the scores provided by the three methods (cut-off = 0.50)
F1β-1	At5g08670	Ser8	ASRRVL[S]SLLR	0.550	0.898	0.074	0.507
		Ser15	SLLRSS[S]GRSA	0.547	0.847	0.369	0.588
F1β-2	At5g08680	Ser8	ASRRIL[S]SLLR	0.522	0.905	0.235	0.554
		Ser57	VAEYST[S]SPAN	0.723	0.671	0.602	0.665
F1β-3	At5g08690	Ser8	ASRRVL[S]SLLR	0.550	0.898	0.074	0.507
		Ser15	SLLRSS[S]GRSA	0.547	0.847	0.369	0.588
CAL2	At3g48680	Thr14	ISKRSI[T]SAVS	0.764	0.937	0.675	0.792
SDH1-2	At2g18450	Ser16	SSRRSE[S]NGAF	0.840	1.199	0.776	0.938
		Ser30	QLSRFF[S]APPS	0.874	1.371	0.965	1.070
COXb	At3g15640	Ser56	VIPRRF[S]SDSE	0.571	0.937	0.261	0.590
		Ser57	IPRRFS[S]DSET	0.672	0.898	0.157	0.576
ATP17	At4g30010	-	-	-	-	-	-

## Sheet: Table S6
Supplementary Table S6: Plasmids and constructs used in this study.
